# Supplementary material
Source: publisher figshare collection journal article supplement (https://springernature.figshare.com/ndownloader/files/14605274)

Supplement Figure 1. Stacked bar plots with numbers of negative and positive animals per camp (ordered by numbers of samples) using two definitions to qualify a sample as positive: (a) both OD ratios  $\geq 3$ ; and (b) both OD ratios  $\geq 4$ .

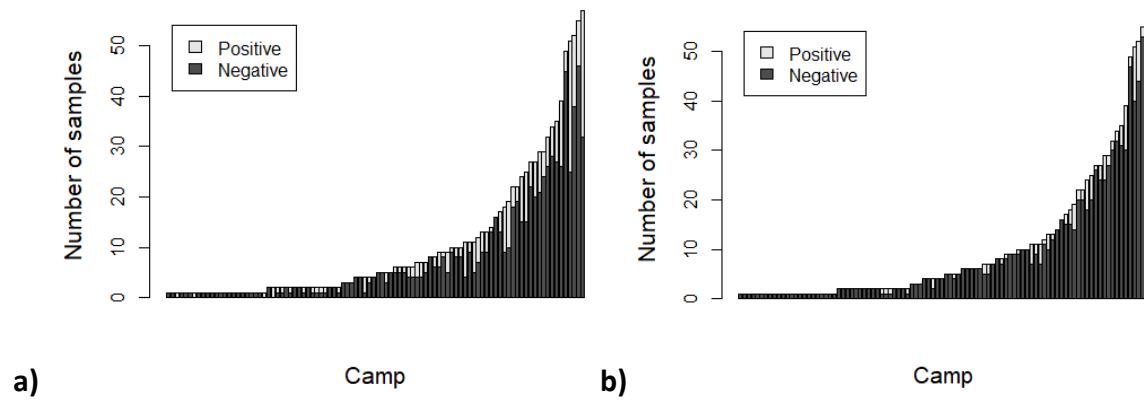

Supplement: Supplementary file [file 14605274]
